# Supplementary material for: Impact of Promoter Polymorphisms on the Transcriptional Regulation of the Organic Cation Transporter OCT1 (SLC22A1)
Source: MDPI journal article supplement (doi:10.3390/jpm8040042), 2018-12-11
Supplement: s1 [file s1]

## Supplementary

**Table S1.** Common SNPs (MAF > 1%) in the 5 kb upstream region and in the ECR in intron 1 of the *OCT1* gene.

| SNP ID      | MAF     | Position to ATG | WT | Var |
|-------------|---------|-----------------|----|-----|
| rs4709399   | 0.43211 | -3922           | C  | T   |
| rs6935207   | 0.35304 | -1795           | G  | A   |
| rs456598    | 0.09844 | -4047           | G  | A   |
| rs9457840   | 0.07768 | -1620           | T  | C   |
| rs9457839   | 0.07089 | -4948           | G  | A   |
| rs73598465  | 0.04992 | -430            | T  | A   |
| rs79951329  | 0.03215 | -3941           | C  | T   |
| rs75332505  | 0.03215 | -3638           | T  | A   |
| rs12110656  | 0.03195 | -1419           | T  | A   |
| rs6899549   | 0.01917 | -149            | T  | C   |
| rs57504133  | 0.01857 | -1198           | A  | G   |
| rs145668795 | 0.01458 | +3300           | T  | A   |

SNPs are sorted by the highest MAF. SNPs that are analyzed in this study are shown in green; SNPs that are not analyzed are shown in yellow (within 5 kb upstream region) and orange (within the ECR in intron 1).
